# Supplementary material
Source: Springer Nature journal article supplement (https://www.springermedizin.de/resource/supplementary/13049_2010_158_MOESM2_ESM.pdf/9666004)

Difference between directly calculated  
and ICDPIC calculated ISS

+50  
0  
-50

0 1 2 3 4 5 6 7

Ratio of the number of direct AIS codes over  
the number of ICD-9-CM traumatic codes

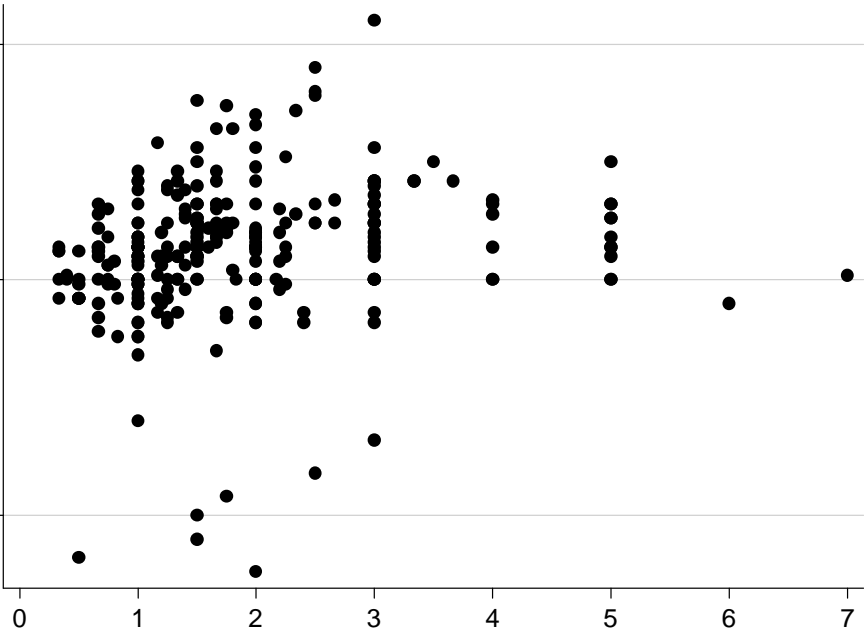

Supplement: MOESM2 [file 9666004]
